# Supplementary material for: Fluorescence quenching by photoinduced electron transfer between 7-methoxycoumarin and guanine base facilitated by hydrogen bonds: an in silico study
Source: Royal Society of Chemistry journal article supplement (doi:10.1039/c9cp02037c), 2019-01-01
Supplement: c9cp02037c1.pdf [file c9cp02037c1.pdf]

**Electronic Supplementary Information**

**Fluorescence quenching by photoinduced electron transfer between  
7-methoxycoumarin and guanine base facilitated by hydrogen bond:  
an *in silico* study**

**Wutthinan Thongyod<sup>a,b</sup>, Chittanon Buranachai<sup>a,b</sup>, Tepakorn Pengpan<sup>a</sup> and  
Chutintorn Punwong<sup>a\*</sup>**

<sup>a</sup>Department of Physics, Faculty of Science, Prince of Songkla University, Songkhla 90112,  
Thailand

<sup>b</sup>Center of Excellence for Trace Analysis and Biosensor, Prince of Songkla University,  
Songkhla 90112, Thailand

\*Corresponding author e-mail address: [chutintorn@gmail.com](mailto:chutintorn@gmail.com)

---

This file replaces the version originally published on the 15th of July 2019.  
The labels in Figure S1 have been modified.

## Calculation of spectra

The area and height of the spectrum is related to the population on  $S_0$  for absorption (and to the population on  $S_1$  and  $S_2$  for emission from these excited states), the transition dipole moment, and the energy gap between the initial state ( $S_i$ ) and the final state ( $S_f$ ).

Therefore, a spectrum is calculated as

$$I(\nu, t) \propto \sum_{I \in S_i} n_I(t) \times \left| \left\langle \psi_{S_f}(r; \bar{R}_I(t) \middle| \vec{\mu} \middle| \psi_{S_i}(r; \bar{R}_I(t) \right\rangle \right|^2 \times \left( \frac{|E_{S_i} - E_{S_f}|}{h} \right)^3$$

where the sum is limited by the trajectory basis functions (TBFs) that propagating on  $S_0$  for absorption or on  $S_1$  and  $S_2$  for emission from these excited states,  $n_I(t)$  is population of the  $I$ th TBF as calculated from inner product of wave function coefficient,  $\psi_{S_i/S_f}$  is  $S_i/S_f$  electronic wave function,  $\vec{\mu}_{if}$  is  $S_i/S_f$  transition dipole moment operator,  $\bar{R}_I(t)$  is the center of the Gaussian wave packet for the  $I$ th TBF and  $E_{S_i/S_f}$  is the electronic energy on the  $S_i/S_f$  state.

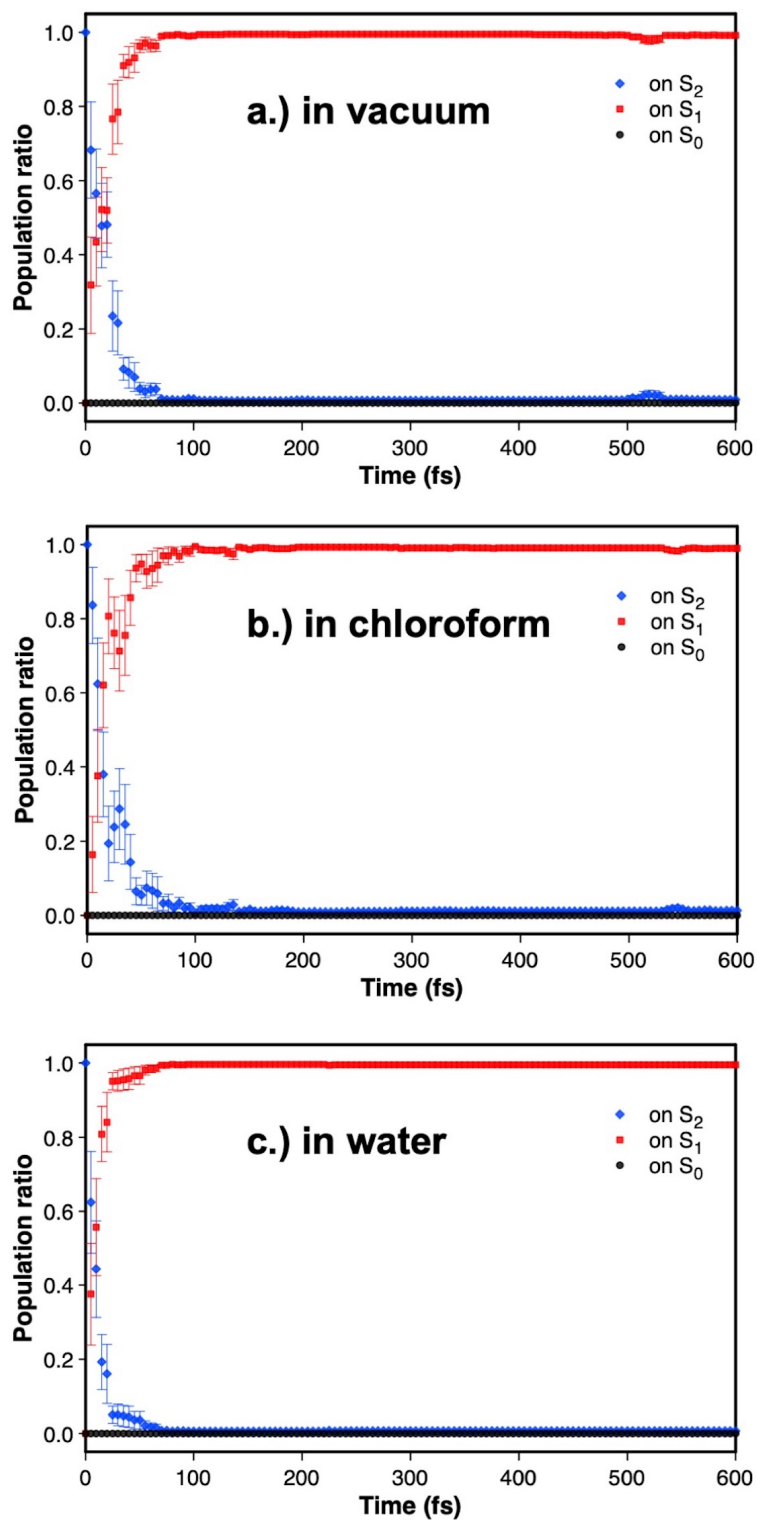

**Fig. S1.** Averaged (over ten initial conditions) S<sub>2</sub> population decay of free 7MC in vacuum (a), in chloroform (b) and in water (c) obtained from direct dynamics simulations. Error bars are given as standard error of the mean.

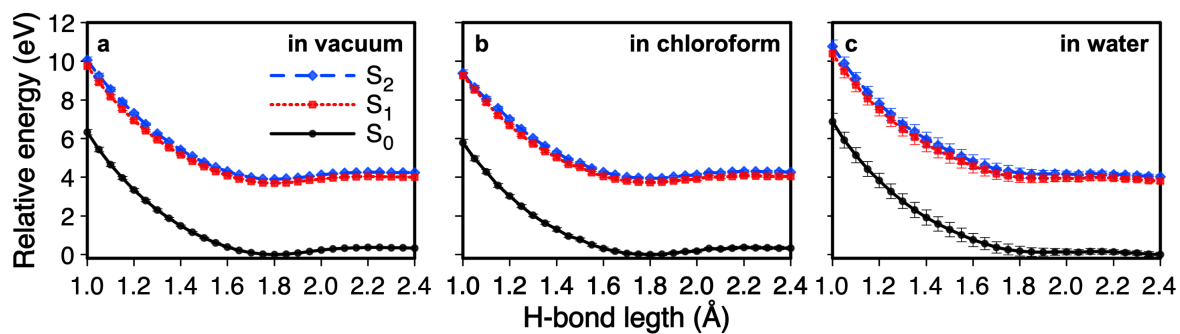

**Fig. S2.** Relative potential energy variation along H-bond length ( $d_1$ ) in vacuum (a), in chloroform (b) and in water (c) on  $S_0$  (solid black lines),  $S_1$  (dotted red lines) and  $S_2$  (dashed blue lines)

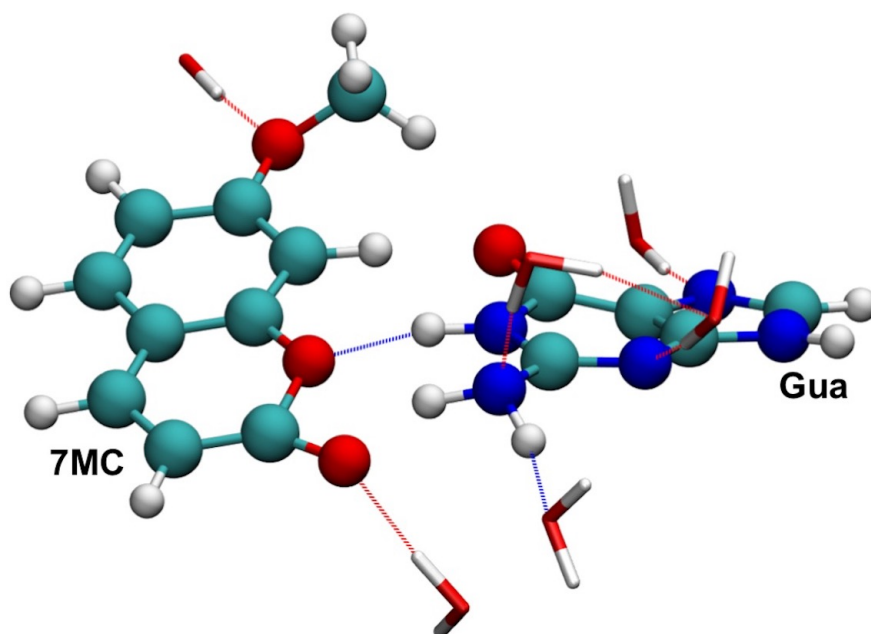

**Fig. S3.** Water molecules disrupt the H-bonding interaction between 7MC and Gua (this figure is rendered from VMD program<sup>1</sup>, the cut-off distance and angle are 3.0 Å and 20°, respectively)

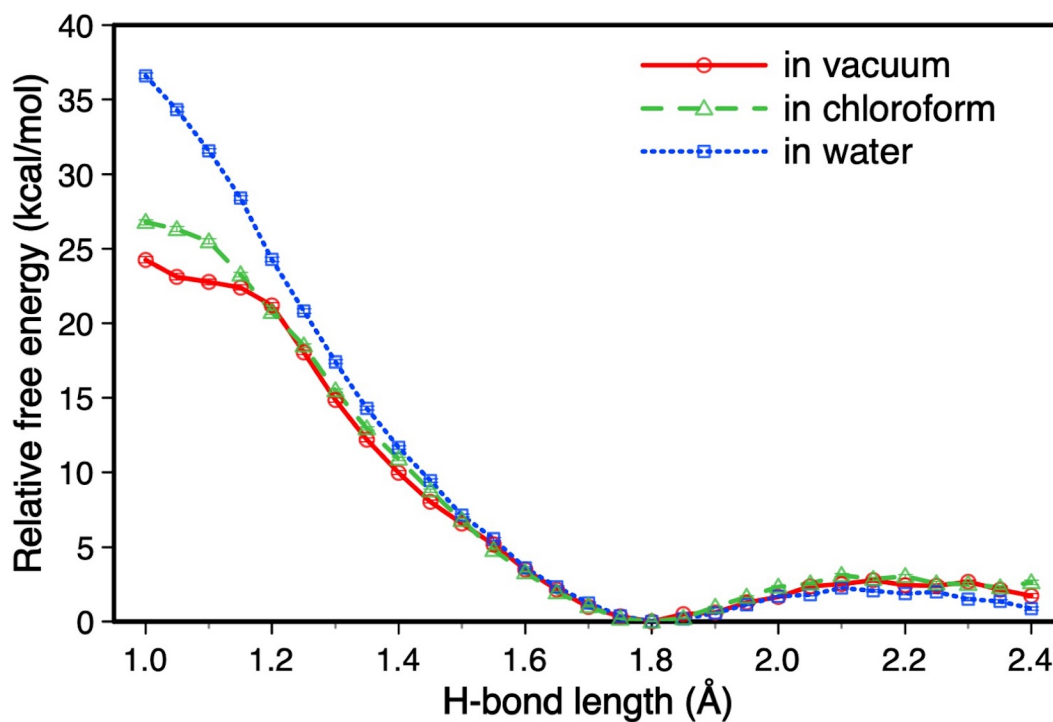

**Fig. S4.** Relative  $S_2$ -free energy curve as a function of the H-bond length ( $d_1$ ) between 7MC and Gua in vacuum (red solid line), in chloroform (green dashed line) and in water (blue dotted line) obtained from the umbrella sampling technique<sup>2</sup> with the weighted histogram analysis method.<sup>3</sup>

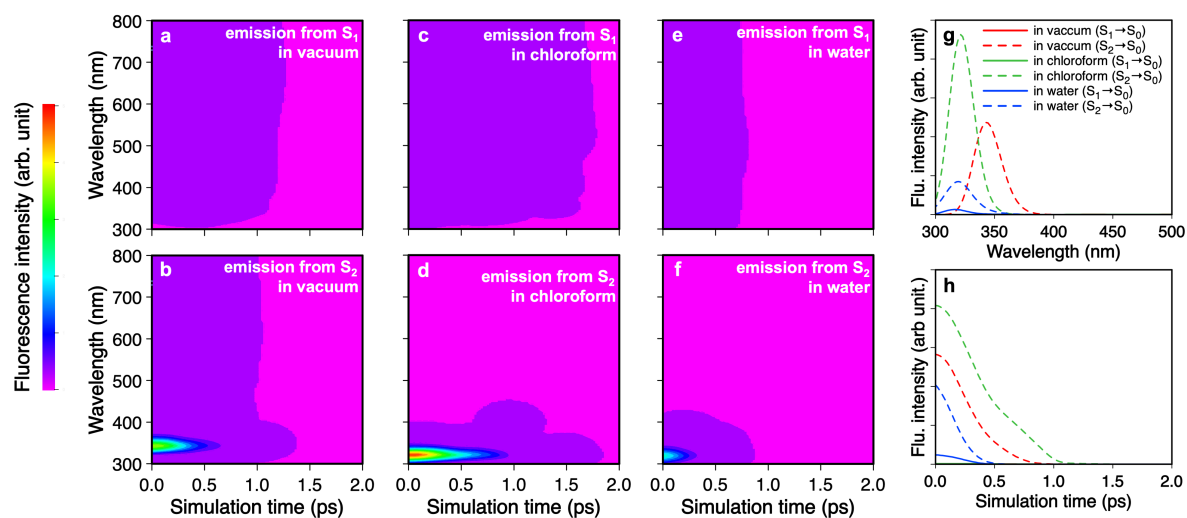

**Fig. S5.** 2-D contour plots of the time-resolved emission spectra of H-bonded 7MC-complex for emission from S<sub>1</sub> (a) and S<sub>2</sub> (b) in vacuum; emission from S<sub>1</sub> (c) and S<sub>2</sub> (d) in chloroform; emission from S<sub>1</sub> (e) and S<sub>2</sub> (f) in water. The integrated emission spectra (g) and time-resolved total fluorescence emission (h) of free 7MC in vacuum, water and chloroform are shown in red, blue and green colors, respectively, with emissions from S<sub>1</sub> represented as solid lines and emission from S<sub>2</sub> represented as dashed lines.

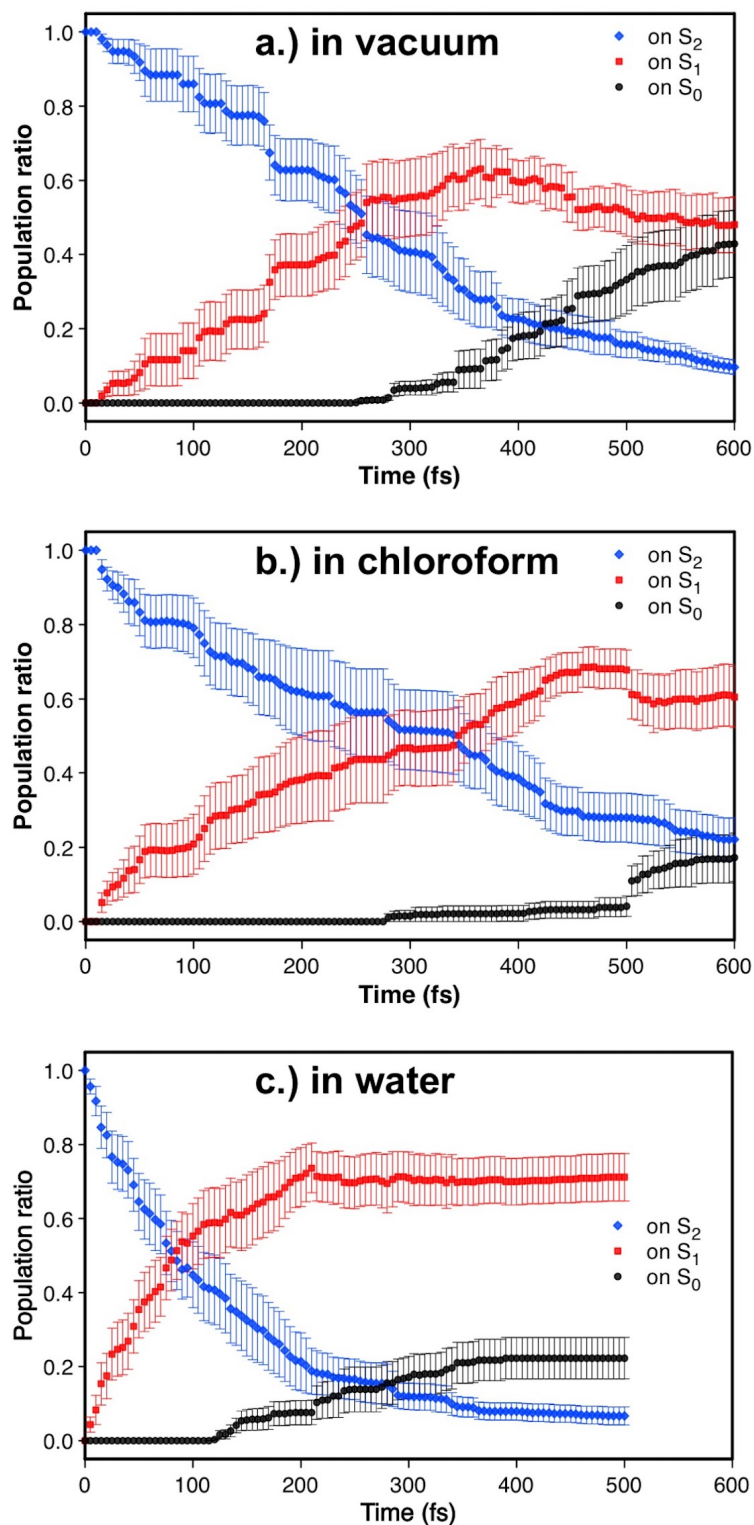

**Fig. S6.** Averaged (over ten initial conditions) S<sub>2</sub> population decay of H-bonded 7MC-complex in vacuum (a), in chloroform (b) and in water (c) obtained from direct dynamics simulations. Error bars are given as standard error of the mean.

**References**

1. W. Humphrey, A. Dalke and K. Schulten, *J. Mol. Graph.*, 1996, **14**, 33-38, 27-38.
2. G. M. Torrie and J. P. Valleau, *J. Comput. Phys.*, 1977, **23**, 187-199.
3. S. Kumar, J. M. Rosenberg, D. Bouzida, R. H. Swendsen and P. A. Kollman, *J. Comput. Chem.*, 1992, **13**, 1011-1021.
